# Supplementary material for: Climate change disturbances contextualize the outcomes of coral-reef fisheries management across Micronesia
Source: PLOS journal article supplement (doi:10.1371/journal.pclm.0000040), 2022-07-22
Supplement: S4 (10.1371/journal.pclm.0000040.s004) [file journal.pclm.0000040.s004]

S2 Figure. Size-structure (a) and abundance (b) of Micronesia fish assemblages in the year before, 1-year after, and 3-years after a mass coral bleaching event. Trends are shown for both MPA and non-MPA reefs open for fishing.
